# Supplementary material
Source: MDPI journal article supplement (https://www.mdpi.com/2073-4395/11/5/943)
Supplement: s1 [file s1]

**Supplementary Table S1.** Tall fescue cultivars and their associated distribution company tested at the agricultural experimental farm of Padova University in Legnaro, northeastern Italy (45°20' N, 11°57' E).

| Cultivar        | Distributor                          |
|-----------------|--------------------------------------|
| Dynamites LS    | Mountain View Seeds (Salem, OR, USA) |
| Titanium 2LS    | Mountain View Seeds (Salem, OR, USA) |
| Supersonic      | Mountain View Seeds (Salem, OR, USA) |
| Ares            | Mountain View Seeds (Salem, OR, USA) |
| Firecracker SLS | Mountain View Seeds (Salem, OR, USA) |
| Lexington       | Columbia Seeds (Albany, OR, USA)     |
| Talladega       | Columbia Seeds(Albany, OR, USA)      |
| Thunderstruck   | Columbia Seeds(Albany, OR, USA)      |
| Rhambler        | TMI (Tangent, OR, USA)               |
| Karakum         | Den Haan Zaden (Rotterdam, NE, UE)   |
| Starlett        | DLF (Roskilde, DK, UE)               |
| Armani          | DLF (Roskilde, DK, UE)               |
| Foxhound        | DLF (Roskilde, DK, UE)               |
| Turfway         | DLF (Roskilde, DK, UE)               |
| Granditte       | DLF (Roskilde, DK, UE)               |
| Rebounder       | DLF (Roskilde, DK, UE)               |
| Firewall        | DLF (Roskilde, DK, UE)               |
| Olympic Gold    | DLF (Roskilde, DK, UE)               |
| JT-338          | Jacklin (Albany, OR, USA)            |
| JT-LT2          | Jacklin (Albany, OR, USA)            |

**Supplementary Table S2.** Turfgrass visual color of 20 tall fescue cultivars mowed weekly at 18 mm in Legnaro, PD (Italy). Data are pooled over 2 years and 3 replicates.

|              | Jan | Feb | Mar | Apr | May | Jun | Jul | Aug | Sep | Oct | Nov | Dec |
|--------------|-----|-----|-----|-----|-----|-----|-----|-----|-----|-----|-----|-----|
| Ares         | 6.6 | 5.5 | 5.8 | 8.0 | 7.7 | 7.3 | 7.0 | 6.3 | 6.8 | 8.2 | 8.3 | 8.0 |
| Armani       | 4.7 | 4.7 | 5.0 | 4.9 | 5.0 | 5.0 | 5.0 | 4.5 | 5.0 | 6.0 | 5.8 | 5.0 |
| Dynamite ls  | 6.2 | 5.0 | 5.7 | 7.2 | 7.2 | 7.0 | 6.3 | 5.6 | 6.4 | 7.8 | 7.9 | 7.5 |
| Firecrackers | 5.7 | 5.0 | 6.0 | 6.9 | 7.0 | 6.7 | 6.7 | 6.1 | 6.7 | 7.3 | 7.3 | 7.3 |
| Firewall     | 5.2 | 5.0 | 5.7 | 6.7 | 6.8 | 6.7 | 6.4 | 6.2 | 6.8 | 7.3 | 7.4 | 7.0 |
| Foxhound     | 6.2 | 5.3 | 6.0 | 8.4 | 8.7 | 7.8 | 7.4 | 7.3 | 7.7 | 8.7 | 8.6 | 7.8 |
| Granditte    | 5.9 | 5.2 | 5.7 | 6.6 | 7.1 | 7.3 | 7.0 | 6.7 | 7.0 | 7.3 | 7.3 | 7.2 |
| JT-338       | 5.4 | 4.7 | 5.7 | 7.5 | 7.4 | 7.5 | 6.8 | 6.6 | 7.2 | 8.0 | 7.8 | 7.7 |
| JT-LT2       | 6.7 | 5.2 | 6.2 | 7.3 | 7.3 | 7.1 | 6.7 | 5.9 | 6.5 | 8.0 | 7.9 | 8.0 |
| Karakum      | 5.1 | 4.3 | 5.2 | 5.9 | 6.1 | 6.4 | 5.9 | 5.6 | 6.3 | 6.6 | 6.4 | 6.2 |

|                       |     |     |     |     |     |     |     |     |     |     |     |     |
|-----------------------|-----|-----|-----|-----|-----|-----|-----|-----|-----|-----|-----|-----|
| Lexington             | 4.8 | 4.7 | 5.5 | 6.0 | 6.3 | 6.5 | 6.1 | 5.5 | 6.3 | 7.1 | 7.2 | 6.3 |
| Olympic Gold          | 5.2 | 5.0 | 5.3 | 5.8 | 6.0 | 5.9 | 5.2 | 4.9 | 5.6 | 6.5 | 6.7 | 6.0 |
| Rebounder             | 6.1 | 5.0 | 5.5 | 7.5 | 7.8 | 7.7 | 7.2 | 6.6 | 7.2 | 8.3 | 8.1 | 7.7 |
| Rhambler srp          | 5.2 | 4.7 | 5.7 | 6.8 | 6.8 | 6.9 | 6.5 | 6.3 | 6.5 | 7.2 | 7.3 | 6.7 |
| Starlett              | 5.4 | 4.7 | 5.2 | 5.8 | 6.0 | 6.2 | 6.0 | 5.2 | 6.1 | 7.1 | 7.0 | 6.3 |
| Supersonic            | 5.8 | 4.7 | 5.7 | 6.6 | 6.8 | 6.7 | 6.5 | 6.1 | 6.5 | 7.3 | 7.3 | 6.7 |
| Talladega             | 4.9 | 4.7 | 5.3 | 6.7 | 7.0 | 6.7 | 6.5 | 5.7 | 6.0 | 6.9 | 7.0 | 6.3 |
| Thunderstruck         | 6.3 | 5.0 | 5.8 | 8.2 | 8.0 | 7.8 | 6.9 | 6.4 | 7.2 | 8.6 | 8.4 | 8.5 |
| Titanium              | 5.8 | 5.2 | 5.5 | 7.3 | 7.3 | 6.9 | 6.5 | 6.3 | 6.5 | 7.6 | 7.5 | 7.0 |
| Turfway               | 7.1 | 5.5 | 6.5 | 8.1 | 8.8 | 8.7 | 7.8 | 7.4 | 8.1 | 8.8 | 8.8 | 8.7 |
| LSD <sup>†</sup> =0.2 |     |     |     |     |     |     |     |     |     |     |     |     |

<sup>†</sup>To determine statistical differences among entries, subtract one entry's mean from another entry's mean. Statistical differences occur when this value is larger than the corresponding LSD value ( $P < 0.05$ ).

**Supplementary Table S3.** Turfgrass visual density of 20 tall fescue cultivars mowed weekly at 18 mm in Legnaro, PD (Italy). Data are pooled over 2 years and 3 replicates.

|               | Jan | Feb | Mar | Apr | May | Jun | Jul | Aug | Sep | Oct | Nov | Dec |
|---------------|-----|-----|-----|-----|-----|-----|-----|-----|-----|-----|-----|-----|
| Ares          | 7.3 | 7.3 | 6.8 | 6.4 | 6.8 | 7.1 | 7.0 | 5.4 | 5.5 | 6.5 | 7.1 | 7.3 |
| Armani        | 6.0 | 6.0 | 6.2 | 5.7 | 5.8 | 6.0 | 6.1 | 5.9 | 6.4 | 7.0 | 6.8 | 7.0 |
| Dynamite ls   | 7.0 | 7.0 | 7.0 | 6.4 | 6.6 | 6.9 | 7.0 | 5.5 | 5.8 | 6.8 | 7.1 | 7.3 |
| Firecrackers  | 7.0 | 7.0 | 6.8 | 6.5 | 6.8 | 7.0 | 7.0 | 6.0 | 6.4 | 7.3 | 7.4 | 7.3 |
| Firewall      | 7.7 | 7.7 | 7.3 | 6.3 | 6.3 | 6.8 | 7.0 | 6.5 | 6.6 | 7.9 | 7.9 | 7.7 |
| Foxhound      | 6.7 | 6.7 | 6.5 | 6.8 | 7.3 | 7.3 | 7.3 | 6.3 | 6.2 | 7.3 | 7.6 | 7.7 |
| Granditte     | 7.7 | 7.7 | 7.2 | 6.4 | 6.7 | 7.3 | 7.4 | 6.7 | 7.1 | 8.2 | 7.9 | 7.7 |
| JT-338        | 7.9 | 7.7 | 7.5 | 7.2 | 7.7 | 7.7 | 7.7 | 6.6 | 7.1 | 8.2 | 8.3 | 8.0 |
| JT-LT2        | 6.7 | 6.7 | 6.0 | 6.7 | 6.6 | 6.6 | 6.4 | 5.6 | 5.8 | 6.3 | 6.8 | 7.0 |
| Karakum       | 7.0 | 7.0 | 6.8 | 6.1 | 6.2 | 6.5 | 6.7 | 6.2 | 6.7 | 7.3 | 7.0 | 7.0 |
| Lexington     | 6.7 | 6.7 | 6.5 | 5.8 | 6.3 | 6.4 | 6.8 | 6.2 | 6.5 | 6.9 | 7.1 | 7.0 |
| Olympic Gold  | 6.7 | 6.7 | 6.0 | 6.0 | 6.1 | 6.2 | 6.0 | 5.4 | 5.6 | 6.5 | 6.6 | 7.0 |
| Rebounder     | 7.7 | 7.7 | 7.3 | 6.8 | 7.3 | 7.3 | 7.3 | 6.4 | 6.7 | 7.4 | 7.9 | 8.0 |
| Rhambler srp  | 7.7 | 7.7 | 7.3 | 6.7 | 6.8 | 7.0 | 7.2 | 6.4 | 7.0 | 7.5 | 7.7 | 7.7 |
| Starlett      | 6.7 | 6.7 | 6.0 | 5.8 | 5.9 | 6.3 | 6.3 | 5.2 | 5.5 | 6.4 | 6.7 | 7.0 |
| Supersonic    | 7.3 | 7.3 | 7.0 | 6.3 | 6.6 | 6.7 | 6.8 | 6.6 | 6.7 | 7.3 | 7.7 | 7.7 |
| Talladega     | 7.0 | 7.0 | 6.3 | 6.3 | 6.6 | 6.8 | 6.9 | 6.0 | 6.4 | 6.8 | 7.2 | 7.0 |
| Thunderstruck | 7.0 | 7.0 | 7.0 | 6.2 | 6.6 | 7.0 | 7.1 | 6.1 | 6.1 | 7.1 | 7.2 | 7.7 |
| Titanium      | 7.3 | 7.3 | 7.2 | 6.6 | 7.1 | 7.4 | 7.2 | 6.9 | 7.2 | 7.9 | 8.3 | 8.0 |
| Turfway       | 7.7 | 7.7 | 7.3 | 6.8 | 7.3 | 7.5 | 7.3 | 6.6 | 6.8 | 7.4 | 7.5 | 7.3 |

LSD<sup>†</sup>=0.2

<sup>†</sup>To determine statistical differences among entries, subtract one entry's mean from another entry's mean. Statistical differences occur when this value is larger than the corresponding LSD value ( $P < 0.05$ ).

**Supplementary Table S4.** Turfgrass visual texture of 20 tall fescue cultivars mowed weekly at 18 mm in Legnaro, PD (Italy). Data are pooled over 2 years and 3 replicates.

|               | Jan | Feb | Mar | Apr | May | Jun | Jul | Aug | Sep | Oct | Nov | Dec |
|---------------|-----|-----|-----|-----|-----|-----|-----|-----|-----|-----|-----|-----|
| Ares          | 7.3 | 6.7 | 6.3 | 6.6 | 6.8 | 6.9 | 7.3 | 6.9 | 6.8 | 6.7 | 6.7 | 7.0 |
| Armani        | 7.3 | 6.7 | 7.3 | 7.2 | 7.4 | 7.8 | 7.9 | 7.7 | 7.8 | 7.7 | 7.7 | 7.5 |
| Dynamite ls   | 7.1 | 6.7 | 6.7 | 6.8 | 7.0 | 7.3 | 7.1 | 6.8 | 6.8 | 6.9 | 7.0 | 7.0 |
| Firecrackers  | 6.4 | 6.3 | 6.5 | 6.7 | 6.9 | 7.3 | 7.1 | 6.9 | 6.6 | 6.9 | 6.8 | 7.2 |
| Firewall      | 7.1 | 6.3 | 6.7 | 6.4 | 6.3 | 7.0 | 6.9 | 6.9 | 6.6 | 7.2 | 7.3 | 6.8 |
| Foxhound      | 6.7 | 6.3 | 6.7 | 6.8 | 7.2 | 7.3 | 7.2 | 6.6 | 6.4 | 6.8 | 6.8 | 7.0 |
| Granditte     | 6.3 | 6.0 | 6.3 | 5.9 | 6.6 | 6.8 | 6.8 | 6.7 | 6.8 | 7.0 | 7.2 | 6.8 |
| JT-338        | 7.6 | 6.7 | 6.7 | 6.8 | 7.3 | 7.6 | 7.5 | 7.3 | 7.4 | 7.9 | 8.0 | 7.5 |
| JT-LT2        | 7.1 | 6.3 | 6.3 | 7.1 | 6.8 | 6.8 | 7.0 | 6.6 | 6.7 | 7.0 | 7.2 | 7.0 |
| Karakum       | 5.7 | 5.3 | 5.3 | 5.8 | 6.0 | 6.1 | 6.3 | 6.2 | 6.1 | 6.2 | 6.5 | 5.7 |
| Lexington     | 5.8 | 5.3 | 5.8 | 6.0 | 6.2 | 6.2 | 6.2 | 6.0 | 5.8 | 6.2 | 6.5 | 6.2 |
| Olympic Gold  | 5.1 | 5.0 | 5.0 | 5.0 | 5.0 | 5.1 | 5.0 | 5.0 | 5.2 | 5.3 | 5.5 | 5.3 |
| Rebounder     | 7.1 | 6.3 | 6.8 | 6.8 | 7.0 | 7.1 | 7.3 | 6.9 | 7.0 | 6.8 | 7.0 | 6.7 |
| Rhambler srp  | 6.7 | 6.0 | 6.7 | 6.3 | 6.5 | 6.8 | 6.8 | 6.8 | 6.8 | 7.0 | 7.2 | 7.2 |
| Starlett      | 5.0 | 5.0 | 5.3 | 5.6 | 5.8 | 5.9 | 6.0 | 5.9 | 5.8 | 5.3 | 5.3 | 5.3 |
| Supersonic    | 6.7 | 6.0 | 5.8 | 6.1 | 6.4 | 6.7 | 6.8 | 6.7 | 6.5 | 6.7 | 6.8 | 6.7 |
| Talladega     | 5.4 | 5.7 | 5.5 | 5.6 | 5.7 | 6.1 | 5.8 | 5.8 | 5.8 | 5.9 | 5.8 | 6.0 |
| Thunderstruck | 5.7 | 5.3 | 5.5 | 6.3 | 6.4 | 6.6 | 6.4 | 6.2 | 6.1 | 6.3 | 6.3 | 6.2 |
| Titanium      | 6.9 | 6.7 | 6.7 | 6.6 | 6.7 | 7.0 | 6.9 | 6.9 | 7.1 | 7.3 | 7.3 | 7.0 |
| Turfway       | 7.0 | 6.7 | 6.8 | 7.1 | 7.5 | 7.6 | 7.5 | 7.1 | 6.9 | 7.4 | 7.3 | 7.0 |

LSD<sup>†</sup>=0.2

<sup>†</sup>To determine statistical differences among entries, subtract one entry's mean from another entry's mean. Statistical differences occur when this value is larger than the corresponding LSD value ( $P < 0.05$ ).

**Supplementary Table S5.** Turfgrass visual uniformity of 20 tall fescue cultivars mowed weekly at 18 mm in Legnaro, PD (Italy). Data are pooled over 2 years and 3 replicates.

|               | Jan | Feb | Mar | Apr | May | Jun | Jul | Aug | Sep | Oct | Nov | Dec |
|---------------|-----|-----|-----|-----|-----|-----|-----|-----|-----|-----|-----|-----|
| Ares          | 7.0 | 7.0 | 6.7 | 7.0 | 7.0 | 7.3 | 7.1 | 5.5 | 5.5 | 6.5 | 6.9 | 7.2 |
| Armani        | 6.0 | 6.0 | 6.0 | 6.0 | 6.5 | 7.6 | 7.3 | 5.8 | 6.3 | 7.1 | 7.7 | 7.2 |
| Dynamite ls   | 7.0 | 7.0 | 7.0 | 8.0 | 7.7 | 7.5 | 7.3 | 5.5 | 5.8 | 6.9 | 7.5 | 7.2 |
| Firecrackers  | 6.7 | 6.7 | 6.5 | 6.7 | 7.0 | 7.4 | 6.8 | 5.8 | 6.1 | 6.8 | 7.3 | 7.3 |
| Firewall      | 7.3 | 7.3 | 7.3 | 8.0 | 8.0 | 7.7 | 7.1 | 6.3 | 6.6 | 7.7 | 7.9 | 7.2 |
| Foxhound      | 7.3 | 7.3 | 7.0 | 6.3 | 7.0 | 7.4 | 7.2 | 6.3 | 6.2 | 7.3 | 7.3 | 7.7 |
| Granditte     | 6.7 | 6.7 | 6.8 | 7.0 | 7.0 | 7.5 | 7.0 | 6.8 | 7.1 | 7.8 | 7.7 | 7.3 |
| JT-338        | 7.7 | 7.7 | 7.2 | 7.3 | 8.3 | 8.1 | 7.6 | 6.2 | 6.9 | 8.1 | 8.3 | 7.7 |
| JT-LT2        | 6.1 | 5.7 | 5.7 | 6.5 | 7.0 | 6.8 | 5.9 | 4.9 | 5.1 | 5.9 | 6.3 | 6.7 |
| Karakum       | 6.0 | 6.0 | 6.2 | 6.5 | 6.7 | 7.2 | 6.8 | 6.2 | 6.8 | 7.3 | 7.3 | 7.0 |
| Lexington     | 6.0 | 6.0 | 6.0 | 6.5 | 6.3 | 6.7 | 6.5 | 5.6 | 5.9 | 6.5 | 6.8 | 7.0 |
| Olympic Gold  | 6.2 | 6.0 | 6.0 | 6.0 | 5.7 | 6.6 | 6.3 | 5.2 | 5.8 | 6.3 | 6.5 | 7.2 |
| Rebounder     | 7.3 | 7.3 | 7.0 | 7.0 | 7.3 | 7.3 | 7.2 | 5.9 | 6.2 | 7.3 | 7.3 | 7.5 |
| Rhambler srp  | 7.0 | 7.0 | 6.8 | 7.0 | 7.2 | 7.4 | 7.1 | 6.4 | 7.0 | 7.5 | 7.8 | 7.5 |
| Starlett      | 5.7 | 5.7 | 5.8 | 5.2 | 5.3 | 6.3 | 6.1 | 4.9 | 5.6 | 6.4 | 6.8 | 7.0 |
| Supersonic    | 6.7 | 6.7 | 6.3 | 6.7 | 6.7 | 7.2 | 6.8 | 6.1 | 6.0 | 6.9 | 7.4 | 6.7 |
| Talladega     | 6.3 | 6.3 | 6.2 | 6.3 | 6.3 | 7.0 | 6.6 | 5.9 | 6.3 | 6.9 | 7.3 | 7.3 |
| Thunderstruck | 6.7 | 6.7 | 6.3 | 7.3 | 7.3 | 7.3 | 6.8 | 5.6 | 6.0 | 7.0 | 7.2 | 7.5 |
| Titanium      | 7.0 | 7.0 | 6.8 | 7.0 | 7.0 | 7.4 | 6.9 | 6.4 | 7.1 | 8.0 | 7.9 | 7.8 |
| Turfway       | 7.7 | 7.7 | 7.3 | 7.8 | 7.8 | 7.8 | 7.6 | 6.2 | 6.3 | 7.6 | 7.8 | 7.7 |

LSD<sup>†</sup>=0.3

<sup>†</sup>To determine statistical differences among entries, subtract one entry's mean from another entry's mean. Statistical differences occur when this value is larger than the corresponding LSD value ( $P < 0.05$ ).
